# Supplementary material for: Systematic Study of Resveratrol Nanoliposomes Transdermal Delivery System for Enhancing Anti-Aging and Skin-Brightening Efficacy
Source: MDPI journal article supplement (doi:10.3390/molecules28062738), 2023-03-17
Supplement: s1 [file s1]

## 知情同意书及承诺书

- 1、使用的产品为白藜芦醇纳米脂质体，早晚各一次，均匀涂抹在面部。
- 2、使用时间为28天，必须每天坚持使用。
- 3、志愿者需要在第0天、第14天以及第28天配合检测面部数据。
- 4、志愿者的面部数据不会用于任何商业用途，只会用于科研用途。
- 5、志愿者同意将这些数据用于科研用途（例如文章发表、专利撰写等）。
- 6、使用该产品不会有不良副作用，如出现不适，请及时停止使用。
- 7、如因不可抗力因素停止使用了产品，请及时联系报备。
- 8、我们承诺已被完全告知所有相关细节。

志愿者签名以及详细信息记录表：

| 编号 | 姓名  | 签名  | 年龄 | 有无<br>皮肤<br>病史 | 有无<br>过敏 | 刺激<br>测试 | 0 | 14 | 28 |
|----|-----|-----|----|----------------|----------|----------|---|----|----|
| 1  | 吴孟丽 | 吴孟丽 |    | 无              | 无        | ✓        | ✓ | ✓  | ✓  |
| 2  | 罗丹  | 罗丹  |    | 无              | 无        | ✓        | ✓ | ✓  | ✓  |
| 3  | 陈丹  | 陈丹  |    | 无              | 无        | ✓        | ✓ | ✓  | ✓  |
| 4  | 周洪  | 周洪  |    | 无              | 无        | ✓        | ✓ | ✓  | ✓  |
| 5  | 赵小静 | 赵小静 |    | 无              | 无        | ✓        | ✓ | ✓  | ✓  |
| 6  | 崔梅  | 崔梅  |    | 无              | 无        | ✓        | ✓ | ✓  | ✓  |
| 7  | 郑耀武 | 郑耀武 |    | 无              | 无        | ✓        | ✓ | ✓  | ✓  |
| 8  | 韩妍艳 | 韩妍艳 |    | 无              | 无        | ✓        | ✓ | ✓  | ✓  |
| 9  | 胡婷  | 胡婷  |    | 无              | 无        | ✓        | ✓ | ✓  | ✓  |
| 10 | 李娇娇 | 李娇娇 |    | 无              | 无        | ✓        | ✓ | ✓  | ✓  |
| 11 | 皮冰冰 | 皮冰冰 |    | 无              | 无        | ✓        | ✓ | ✓  | ✓  |
| 12 | 童琳  | 童琳  |    | 无              | 无        | ✓        | ✓ | ✓  | ✓  |
| 13 | 吴光俊 | 吴光俊 |    | 无              | 无        | ✓        | ✓ | ✓  | ✓  |
| 14 | 吴雨桐 | 吴雨桐 |    | 无              | 无        | ✓        | ✓ | ✓  | ✓  |
| 15 | 熊瑜  | 熊瑜  |    | 无              | 无        | ✓        | ✓ | ✓  | ✓  |

|    |     |     |   |   |   |   |   |   |
|----|-----|-----|---|---|---|---|---|---|
| 16 | 许想平 | 许想平 | 无 | 无 | ✓ | ✓ | ✓ | ✓ |
| 17 | 徐世燕 | 徐世燕 | 无 | 无 | ✓ | ✓ | ✓ | ✓ |
| 18 | 王小康 | 王小康 | 无 | 无 | ✓ | ✓ | ✓ | ✓ |
| 19 | 詹锦非 | 詹锦非 | 无 | 无 | ✓ | ✓ | ✓ | ✓ |
| 20 | 王雨涵 | 王雨涵 | 无 | 无 | ✓ | ✓ | ✓ | ✓ |
| 21 | 叶志芳 | 叶志芳 | 无 | 无 | ✓ | ✓ | ✓ | ✓ |
| 22 | 张利娟 | 张利娟 | 无 | 无 | ✓ | ✓ | ✓ | ✓ |
| 23 | 李承恩 | 李承恩 | 无 | 无 | ✓ | ✓ | ✓ | ✓ |
| 24 | 肖咏  | 肖咏  | 无 | 无 | ✓ | ✓ | ✓ | ✓ |
| 25 | 刘小兵 | 刘小兵 | 无 | 无 | ✓ | ✓ | ✓ | ✓ |
| 26 | 马雯婷 | 马雯婷 | 无 | 无 | ✓ | ✓ | ✓ | ✓ |
| 27 | 孙安媛 | 孙安媛 | 无 | 无 | ✓ | ✓ | ✓ | ✓ |
| 28 | 孔建军 | 孔建军 | 无 | 无 | ✓ | ✓ | ✓ | ✓ |
| 29 | 郑方佟 | 郑方佟 | 无 | 无 | ✓ | ✓ | ✓ | ✓ |
| 30 | 高珂  | 高珂  | 无 | 无 | ✓ | ✓ | ✓ | ✓ |
| 31 | 王连伟 | 王连伟 | 无 | 无 | ✓ | ✓ | ✓ | ✓ |
| 32 | 方俊  | 方俊  | 无 | 无 | ✓ | ✓ | ✓ | ✓ |
| 33 | 任淑璇 | 任淑璇 | 无 | 无 | ✓ | ✓ | ✓ | ✓ |

我们承诺已被告知所有细节，并且同意这些数据用于科学研究（文章、发表等）。

时间：2022年4月27日
