# Supplementary material for: Systematic Study of Resveratrol Nanoliposomes Transdermal Delivery System for Enhancing Anti-Aging and Skin-Brightening Efficacy
Source: MDPI journal article supplement (doi:10.3390/molecules28062738), 2023-03-17
Supplement: s1 [file s1]

## Supporting Information

# Systematic Study of Resveratrol Nanoliposomes Transdermal Delivery System for Enhancing Anti-Aging and Skin-Brightening Efficacy

Xinchao Zhang <sup>1</sup>, Siyuan Chen <sup>2</sup>, Dan Luo <sup>3</sup>, Dan Chen <sup>3</sup>, Hong Zhou <sup>1</sup>, Shuting Zhang <sup>1</sup>, Xuan Chen <sup>1</sup>, Wangwang Lu <sup>4,\*</sup> and Wei Liu <sup>1,3,\*</sup>

<sup>1</sup> College of Life Science and Technology, Huazhong University of Science and Technology, Wuhan 430074, China

<sup>2</sup> College of Materials Science and Engineering, Suqian Advanced Materials Industry Technology Innovation Center, Nanjing Tech University, Nanjing 211816, China

<sup>3</sup> National Engineering Research Center for Nanomedicine, Huazhong University of Science and Technology, Wuhan 430075, China

<sup>4</sup> Guangzhou Jiyan Cosmetics Technology Co., Ltd., Guangzhou 510275, China

\* Correspondence: leo.lu@yatsenglobal.com (W.L.); wliu@hust.edu.cn (W.L.)

**Figure S1**

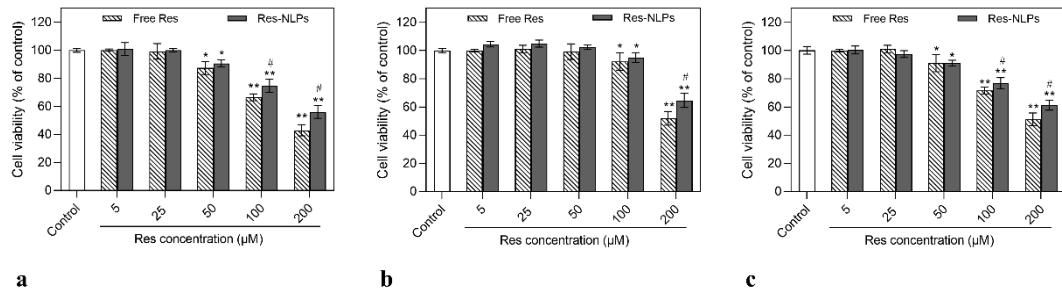

**Figure S1.** In vitro cytotoxicity of the free Res, Res-NLPs against (a) HaCaT, (b) HSF and (c) B16-F10 cells detected by CCK-8. The cells were treated with the free Res or Res-NLPs at the same Res concentrations over a wide range (5–200 μM). Mean ± SD (n = 3). \**p* < 0.05, \*\**p* < 0.01, compared with the control group; #*p* < 0.05, compared with the free Res group.

**Figure S2**

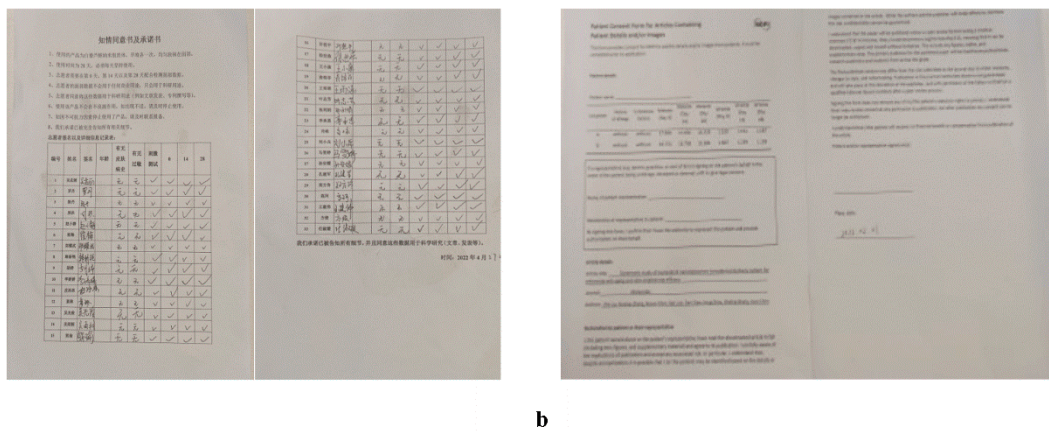

**Figure S2.** Informed Consent Statement. (a) Informed consent statement from all volunteers (Chinese version), (b) especially, informed consent statement from two volunteers whose facial information was included in the manuscript (English version).
